# Supplementary material for: Comparison of Serum Pharmacodynamic Biomarkers in Prednisone-Versus Deflazacort-Treated Duchenne Muscular Dystrophy Boys
Source: J Pers Med. 2020 Oct 12;10(4):164. doi: 10.3390/jpm10040164 (PMC7720112; doi:10.3390/jpm10040164)
Supplement: Supplementary file 1 [file jpm-10-00164-s001.xlsx]

## Sheet: Sheet2
Supplemental Table 1: A subset of DMD patients from the Cooperative International Neuromuscular Research Group Duchenne Natural History Study (CINRG-DNHS).
Patient Num	Age (yrs)	Type of GC	Time on GC	Ambulatory	weight (kg)	Height (cm)	BMI
DMD 1 (Visit 1)	7.34	Pred	1043	Amb	22	114.1	16.8986
DMD 1 (Visit 2)	8.3	Pred	1392	Amb	22.6	116.3	16.7089
DMD 2 (Visit 1)	4.27	Pred	218	Amb	15.9	97.2	16.8292
DMD 2 (Visit 2)	5.21	Pred	455	Amb	17.6	100.4	17.46
DMD 2 (Visit 3)	6.3	Pred	594	Amb	20.5	105.3	18.4883
DMD 3 (Visit 1)	6.31	Pred	315	Amb	18.6	105	16.8707
DMD 3 (Visit 2)	7.28	Pred	672	Amb	22.9	110.5	18.7547
DMD 4 (Visit 1)	4.8	Pred	287	Amb	21.7	106.6	19.0961
DMD 4 (Visit 2)	5.82	Pred	658	Amb	28.1	111	22.8066
DMD 5 (Visit 1)	6.26	Pred	157	Amb	20.5	116	15.2348
DMD 5 (Visit 2)	7.24	Pred	515	Amb	22.6	122	15.1841
DMD 6 (Visit 1)	5.4	Pred	243	Amb	17.6	106.5	15.5172
DMD 6 (Visit 2)	6.42	Pred	615	Amb	19.7	112	15.7047
DMD 7 (Visit 1)	5.67	Pred	604	Amb	19.9	105	18.0499
DMD 7 (Visit 2)	6.65	Pred	960	Amb	21.5	107.8	18.5012
DMD 8 (Visit 1)	5.56	Dfz	300	Amb	21.8	115.5	16.3415
DMD 8 (Visit 2)	6.54	Dfz	657	Amb	23.9	116.6	17.5793
DMD 9 (Visit 1)	4.68	Dfz	71	Amb	15
DMD 9 (Visit 2)	6.4	Dfz	700	Amb	16	102.9	15.1109
DMD 10 (Visit 1)	7.42	Dfz	555	Amb	29.1
DMD 10 (Visit 2)	7.73	Dfz	667	Amb	29	119.4	20.3418
DMD 10 (Visit 3)	8.34	Dfz	892	Amb	30.6	119.2	21.5362
DMD 10 (Visit 4)	9.37	Dfz	1268	Amb	35.4	121.3	24.0592
DMD 11 (Visit 1)	4.96	Dfz	56	Amb	17.3	97.8	18.0871
DMD 11 (Visit 2)	5.53	Dfz	267	Amb	18	98.7	18.4773
DMD 11 (Visit 3)	6.02	Dfz	443	Amb	19.6	102.21	18.7616
DMD 12 (Visit 1)	6.92	Dfz	209	Amb	22.4	116.7	16.4477
DMD 12 (Visit 2)	7.36	Dfz	370	Amb	24.6	118.7	17.4596
DMD 12 (Visit 3)	8.28	Dfz	707	Amb	28.4	122	19.0809
DMD 13 (Visit 1)	5.81	Dfz	209	Amb	23.4	114.5	17.8486
DMD 13 (Visit 2)	6.25	Dfz	370	Amb	25.7	116.1	19.0664
DMD 14 (Visit 1)	6.73	Dfz	197	Amb	21.2	108.3	18.075
DMD 14 (Visit 2)	7.56	Dfz	543	Amb	23.3	111.2	18.8428
DMD 15 (Visit 1)	5.93	Dfz	241	Amb	17.3	107.8	14.887
DMD 15 (Visit 2)	6.86	Dfz	589	Amb	18.4	110.5	15.0693
